# Supplementary material for: Transduction of Brain Neurons in Juvenile Chum Salmon (Oncorhynchus keta) with Recombinant Adeno-Associated Hippocampal Virus Injected into the Cerebellum during Long-Term Monitoring
Source: MDPI journal article supplement (doi:10.3390/ijms23094947), 2022-04-29
Supplement: s1 [file s1]

**Table S1.** Morphometric parameters \* of HuCD-labeled and rAAV-transduced neurons ( $M \pm SD$ ) in the brain of juvenile chum salmon, *O. keta*, at 3 months after a single injection of the adenoviral vector.

| Brain Area                    | DAPI<br>Size of Nuclei /<br>Cells, $\mu\text{m}$ | AAV<br>Size of Cells,<br>Nuclei, Granules,<br>$\mu\text{m}$ | Optical<br>Density,<br>UOD | HuCD<br>Cell Size, $\mu\text{m}$ | Optical<br>Density,<br>UOD | AAV + HuCD<br>Size of Cells,<br>Nuclei, Granules,<br>$\mu\text{m}$ | Optical<br>Density,<br>UOD |
|-------------------------------|--------------------------------------------------|-------------------------------------------------------------|----------------------------|----------------------------------|----------------------------|--------------------------------------------------------------------|----------------------------|
| Cerebellum dorsal matrix zone | $4.5 \pm 0.5 / 3.7 \pm 0.5$                      |                                                             |                            |                                  |                            |                                                                    |                            |
|                               | $5.1 \pm 0.5 / 4.3 \pm 0.3$                      | $1.8 \pm 0.2 / 1.4 \pm 0.2$                                 | +++                        | $5.5 \pm 0.1 / 5.2 \pm 0.2$      | +++                        |                                                                    |                            |
|                               | $7.2 \pm 0.3 / 4.7 \pm 0.2$                      | $3.9 \pm 0.3 / 4.4 \pm 0.3$                                 | ++                         | $10.3 \pm 0.2 / 9.4 \pm 0.2$     | ++                         | $5.4 \pm 0.3 / 4.9 \pm 0.2$                                        | +++                        |
|                               | $11.2 \pm 1.6 / 10 \pm 1.4$                      | $5.6 \pm 0.2 / 4.8 \pm 0.3$                                 | +++                        | $14.8 \pm 1.7 / 8.8 \pm 0.6$     | ++                         |                                                                    |                            |
| Cerebellum lateral area       | $2.4 \pm 0.1 / 2.1 \pm 0.2$                      | $3.6 \pm 0.5 / 3.2 \pm 0.3$                                 | +++                        |                                  |                            |                                                                    | +++                        |
|                               | $2.8 \pm 0.1 / 2.5 \pm 0.1$                      | $5.1 \pm 0.6 / 3.5 \pm 0.4$                                 | +++                        | $4.6 \pm 0.5 / 3.2 \pm 0.4$      | +++ / ++                   | $4.9 \pm 0.2 / 3.9 \pm 0.3$                                        | +++                        |
|                               | $3.2 \pm 0.2 / 2.4 \pm 0.2$                      | $10.5 \pm 0.7 / 2.9 \pm 0.2$                                | +++                        | $7.3 \pm 0.8 / 2.8 \pm 0.1$      | +++                        | $6.9 \pm 1.1 / 3.5 \pm 0.5$                                        | +++                        |
| Cerebellum basal area         | $6.7 \pm 0.3 / 5.9 \pm 0.4$                      |                                                             |                            |                                  |                            |                                                                    |                            |
|                               | $8.1 \pm 0.5 / 6.6 \pm 0.7$                      | $6.6 \pm 0.1 / 6.2 \pm 0.4$                                 | +++                        | $6.1 \pm 0.6 / 4.8 \pm 0.6$      | ++                         | $6 \pm 0.5 / 4.9 \pm 0.4$                                          | ++                         |
|                               | $8.3 \pm 0.9 / 5.2 \pm 0.5$                      | $8.2 \pm 0.7 / 5.5 \pm 0.8$                                 | ++                         | $8.5 \pm 0.5 / 5.1 \pm 0.3$      | +++                        | $8.3 \pm 0.7 / 5.3 \pm 0.4$                                        | +++                        |
|                               | $11.9 \pm 2.4 / 7.6 \pm 0.2$                     | $8.5 \pm 0.4 / 7.4 \pm 0.7$                                 | ++                         |                                  |                            |                                                                    |                            |
| Optic tectum                  | $4.2 \pm 0.3 / 3.2 \pm 0.4$                      | $1.6 \pm 0.2 / 1.3 \pm 0.2$                                 | ++                         |                                  |                            |                                                                    |                            |
|                               | $6.3 \pm 0.7 / 3.4 \pm 0.2$                      | $4.6 \pm 0.7 / 3.6 \pm 0.5$                                 | + / ++                     | $9.9 \pm 1.3 / 9.8 \pm 1.2$      | +++                        |                                                                    |                            |
|                               | $10.8 \pm 0.8 / 2.9 \pm 0.1$                     | $7.4 \pm 0.7 / 5.8 \pm 0.7$                                 | ++                         | $12.3 \pm 1.4 / 9.2 \pm 0.3$     | +++                        | $12.2 \pm 1 / 9.1 \pm 1$                                           | +++                        |
|                               |                                                  | $11.9 \pm 1.3 / 3.5 \pm 0.4$                                | +++                        |                                  |                            |                                                                    |                            |
| Epithalamus                   | $5.6 \pm 0.2 / 4.6 \pm 0.3$                      | $2.8 \pm 0.2 / 2.5 \pm 0.1$                                 | +++                        |                                  |                            |                                                                    |                            |
|                               | $6.7 \pm 0.3 / 5.3 \pm 0.6$                      | $3.9 \pm 0.5 / 3.4 \pm 0.6$                                 | ++                         | $6.5 \pm 0.7 / 6.1 \pm 0.7$      | +++                        | $9.5 \pm 0.9 / 7.2 \pm 0.4$                                        | +++                        |
|                               | $8.5 \pm 0.6 / 5.4 \pm 0.6$                      | $6.2 \pm 0.5 / 5 \pm 0.2$                                   | ++                         | $9.4 \pm 0.6 / 7.4 \pm 0.3$      | ++                         | $12.2 \pm 0.7 / 9.5 \pm 0.2$                                       | ++                         |
|                               |                                                  | $12.1 \pm 0.5 / 9.3 \pm 0.4$                                | ++ / +++                   | $11.4 \pm 1.1 / 9.3 \pm 0.8$     | +++                        |                                                                    | +++                        |
| Posterior tuberculum area     | $4.4 \pm 0.3 / 4.2 \pm 0.4$                      | $2.7 \pm 0.2 / 2.6 \pm 0.2$                                 | +++                        | $8.9 \pm 0.9 / 6.8 \pm 0.9$      | +++                        | $8.1 \pm 0.6 / 6.7 \pm 0.5$                                        | ++                         |
|                               | $5.8 \pm 0.5 / 4.8 \pm 0.5$                      | $8.1 \pm 0.9 / 6.6 \pm 0.5$                                 | ++                         | $13.5 \pm 1.3 / 6.9 \pm 0.8$     | +++                        | $12.4 \pm 1 / 6.4 \pm 0.4$                                         | ++                         |
|                               |                                                  | $12.2 \pm 1.2 / 6.7 \pm 0.5$                                | +                          | $22.1 \pm 3.5 / 11.2 \pm 2.1$    | +++                        |                                                                    |                            |
| <i>Corpus geniculatlim</i>    |                                                  | $2.5 \pm 0.4 / 1.6 \pm 0.3$                                 | ++                         |                                  |                            |                                                                    |                            |
|                               | $3.7 \pm 0.3 / 2.9 \pm 0.4$                      | $3.3 \pm 0.3 / 2.7 \pm 0.7$                                 | ++                         | $3.4 \pm 0.5 / 2.8 \pm 0.6$      | +++                        | $3.2 \pm 0.2 / 2.7 \pm 0.4$                                        | +++                        |
|                               | $5.3 \pm 0.4 / 3 \pm 0.2$                        | $5 \pm 0.5 / 3.3 \pm 0.3$                                   | +++                        | $8.7 \pm 0.8 / 7.3 \pm 0.2$      | +++                        | $8.2 \pm 0.6 / 4.6 \pm 0.6$                                        | +++                        |
|                               | $6.2 \pm 0.5 / 4.9 \pm 0.4$                      | $8.6 \pm 0.5 / 7.5 \pm 0.6$                                 | +++                        | $11.6 \pm 0.8 / 8.5 \pm 0.8$     | +++                        | $10.6 \pm 0.8 / 7.2 \pm 2.3$                                       | +++                        |
|                               |                                                  | $15.6 \pm 0.1 / 9.3 \pm 0.2$                                | ++                         |                                  |                            |                                                                    |                            |

|                         |                       |                        |          |                        |          |                       |          |
|-------------------------|-----------------------|------------------------|----------|------------------------|----------|-----------------------|----------|
| <i>Nucleus rotundus</i> |                       |                        | -        | 4.5 ± 0.5 / 6.6 ± 0.5  | +++      |                       |          |
|                         | 5 ± 0.1 / 3.6 ± 0.2   | 2.1 ± 0.2 / 1.6 ± 0.1  | ++       | 9 ± 0.8 / 6 ± 0.5      | ++       |                       |          |
|                         | 5.6 ± 0.7 / 4.5 ± 0.3 | 7.5 ± 0.6 / 6.7 ± 0.5  | +++      | 12.8 ± 1.3 / 7.9 ± 0.7 | ++ / +++ | 6.6 ± 0.6 / 3.8 ± 0.4 | +++      |
|                         | 6.6 ± 0.8 / 3.2 ± 0.6 | 10.3 ± 0.2 / 5.2 ± 0.2 | ++ / +++ | 14.3 ± 0.8 / 4.4 ± 0.3 | ++       | 7.6 ± 0.5 / 6.5 ± 0.7 | ++       |
|                         |                       | 12.5 ± 0.8 / 6.1 ± 1.3 | +++      | 15.4 ± 1.1 / 7.5 ± 0.3 | +++      |                       |          |
|                         |                       |                        |          | 18.4 ± 0.4 / 11 ± 0.7  | +++ / ++ |                       |          |
| <b>Dorsal thalamus</b>  | 3.7 ± 0.4 / 3.2 ± 0.4 | 2.2 ± 0.1 / 1.9 ± 0.3  | +++      | 5.2 ± 0.6 / 4.5 ± 0.4  | +++      |                       |          |
|                         | 4.9 ± 0.4 / 4 ± 0.4   | 3.6 ± 0.4 / 3.8 ± 0.4  | ++       | 6.7 ± 0.1 / 5.3 ± 0.6  | +++      | 7.9 ± 1.4 / 7.2 ± 0.8 | ++ / +++ |
|                         | 7 ± 0.6 / 5.3 ± 0.9   | 4.5 ± 0.3 / 3.7 ± 0.3  | +++      | 7.6 ± 0.4 / 4.4 ± 0.3  | +++      |                       |          |
|                         |                       |                        |          | 9.7 ± 0.8 / 7.9 ± 0.2  | +++      |                       |          |
| <b>Epiphysis</b>        | 3.6 ± 0.1 / 2.1 ± 0.1 |                        |          | 4.6 ± 0.4 / 3.9 ± 0.4  | +++      | 4.2 ± 0.4 / 3.6 ± 0.5 | +++      |
|                         | 3.7 ± 0.4 / 3.5 ± 0.3 | 4 ± 0.3 / 3.4 ± 0.6    | +++      | 5 ± 0.2 / 4.5 ± 0.4    | +++      | 5.1 ± 0.3 / 4.4 ± 0.3 | +++      |
|                         | 4.6 ± 0.3 / 3.8 ± 0.4 | 5.2 ± 0.4 / 4.5 ± 0.4  | ++ / +++ | 6 ± 0.5 / 4.6 ± 0.2    | ++       |                       |          |
|                         | 5.6 ± 0.3 / 4.5 ± 0.5 |                        |          |                        |          |                       |          |

\* Values for the greater and lesser diameters of nuclei or cell bodies.
