# Supplementary material for: Transduction of Brain Neurons in Juvenile Chum Salmon (Oncorhynchus keta) with Recombinant Adeno-Associated Hippocampal Virus Injected into the Cerebellum during Long-Term Monitoring
Source: MDPI journal article supplement (doi:10.3390/ijms23094947), 2022-04-29
Supplement: s1 [file s1]

**Table S2.** Percentage of HuCD-tagged and rAAV-transduced neurons in the brain of juvenile chum salmon, *O. keta*, at 90 days after a single injection of rAAV into the *corpus cerebelli*.

| Brain Area                    | GCaMP6m-GFP+, % | HuCD, % | GCaMP6m-GFP+/HuCD, % |
|-------------------------------|-----------------|---------|----------------------|
| Cerebellum dorsal matrix zone | 5               | 6.3     | 3.7                  |
| Cerebellum lateral area       | 7.7             | 8.8     | 5.5                  |
| Cerebellum basal area         | 8.6             | 8.9     | 8.7                  |
| Tectum                        | 4.1             | 6.9     | 3.1                  |
| Dorsal thalamus               | 21.1            | 30      | 3.3                  |
| Epithalamus                   | 2.4             | 11.5    | 1.2                  |
| Epiphysis                     | 2.9             | 3.4     | 0.9                  |
| Posterior tuberculum area     | 7.3             | 9.3     | 2                    |
| <i>Nucleus rotundus</i>       | 8.9             | 12.9    | 8.9                  |
| <i>Corpus geniculatlim</i>    | 6.7             | 15.2    | 6.7                  |
